# Supplementary material
Source: publisher site journal article supplement (https://jamanetwork.com/journals/PEDS/articlepdf/2485360/poi150104supp1_prod.pdf)
Supplement: Supplementary file 1 [file poi150104supp1_prod.pdf]

## Supplementary Online Content

Shattuck A, Finkelhor D, Turner H, Hamby S. Children exposed to abuse in youth-serving organizations: results from national sample surveys. *JAMA Pediatr*. Published online February 1, 2016. doi:10.1001/jamapediatrics.2015.4493.

eAppendix. Frequencies of Individual JVQ Items Used to Assess Lifetime Victimization by YSO Perpetrator.

This supplementary material has been provided by the authors to give readers additional information about their work.

## eAppendix

Frequencies of individual JVQ items used to assess lifetime victimization by YSO perpetrator

| Questionnaire item:                                                                                                                                                                                                                                                                                                                | Percent reporting<br>the victimization<br>type in lifetime by a<br>YSO perpetrator | n  |
|------------------------------------------------------------------------------------------------------------------------------------------------------------------------------------------------------------------------------------------------------------------------------------------------------------------------------------|------------------------------------------------------------------------------------|----|
| C4. Sometimes people are attacked with sticks, rocks, guns, knives, or other things that would hurt. At any time in (your child's/your) life did anyone hit or attack (your child/you) on purpose with an object or weapon? Somewhere like: at home, at school, at a store, in a car, on the street, or anywhere else?             | 0.03                                                                               | 4  |
| C5. At any time in (your child's/your) life, did anyone hit or attack (your child/you) WITHOUT using an object or weapon?                                                                                                                                                                                                          | 0.09                                                                               | 9  |
| C6. At any time in (your child's/your) life, did someone start to attack (your child/you) , but for some reason, it didn't happen? For example, someone helped (your child/you) or (your child/you) got away?                                                                                                                      | 0.01                                                                               | 2  |
| C7. At any time in (your child's/your) life, did someone threaten to hurt (your child/you) when (your child/you) thought they might really do it?                                                                                                                                                                                  | 0.01                                                                               | 4  |
| C9. At any time in (your child's/your) life, (has your child/have you) been hit or attacked because of (your child's/your) skin color, religion, or where (your child's/your) family comes from? Because of a physical problem (your child has/you have)? Or because someone said (your child was/you were) gay?                   | 0.03                                                                               | 3  |
| M1. Not including spanking on (his/her /your) bottom, At any time in (your child's/your) life did a grown-up in (your child's/your) life hit, beat, kick, or physically hurt (your child/you) in any way?                                                                                                                          | 0.11                                                                               | 11 |
| M2. At any time in (your child's/your) life , did (your child/you) get scared or feel really bad because grown-ups in (your child's/your) life called (him/her /you) names, said mean things to (him/her /you), or said they didn't want (him/her /you)?                                                                           | 0.41                                                                               | 60 |
| M3. When someone is neglected, it means that the grown-ups in their life didn't take care of them the way they should. They might not get them enough food, take them to the doctor when they are sick, or make sure they have a safe place to stay. At any time in (your child's/your) life, (was your child/were you) neglected? | 0.01                                                                               | 3  |
| P1. Sometimes groups of kids or gangs attack people. At any time in (your child's/your) life, did a group of kids or a gang hit, jump, or attack (your child/you)?                                                                                                                                                                 | 0.00                                                                               | 0  |
| P2. (If yes to P1, say: "Other than what you just told me about.....") At any time in (your child's/your) life, did any kid, even a brother or sister, hit (your child/you) ? Somewhere like: at home, at school, out playing, in a store, or anywhere else?                                                                       | 0.04                                                                               | 4  |

| Questionnaire item:                                                                                                                                                                                                                                                                                          | Percent reporting the victimization type in lifetime by a YSO perpetrator | n  |
|--------------------------------------------------------------------------------------------------------------------------------------------------------------------------------------------------------------------------------------------------------------------------------------------------------------|---------------------------------------------------------------------------|----|
| P3. At any time in (your child's/your) life, did any kids try to hurt (your child's/your) private parts on purpose by hitting or kicking (your child/you) there?                                                                                                                                             | 0.01                                                                      | 1  |
| P4. At any time in (your child's/your) life, did any kids, even a brother or sister, pick on (your child/you) by chasing (your child/you) or grabbing (your child/you) or by making (him/her /you) do something (he/she /you) didn't want to do?                                                             | 0.00                                                                      | 3  |
| P5. At any time in (your child's/your) life, did (your child/you) get really scared or feel really bad because kids were calling (him/her /you) names, saying mean things to (him/her /you), or saying they didn't want (him/her /you) around?                                                               | 0.08                                                                      | 10 |
| P7. At any time in (your child's/your) life, did any kids ever tell lies or spread rumors about (him/her/you), or tried to make others dislike (him/her/you)?                                                                                                                                                | 0.00                                                                      | 2  |
| P8. At any time in (your child's/your) life, did any kids ever keep (him/her/you) out of things on purpose, excluded (him/her/you) from their group of friends, or completely ignored (him/her/you)?                                                                                                         | 0.03                                                                      | 4  |
| S1. At any time in (your child's/your) life, did a <u>grown-up (your child knows/you know)</u> touch (your child's/your) private parts when they shouldn't have or make (your child/you) touch their private parts? Or did a <u>grown-up (your child knows/you know)</u> force (your child/you) to have sex? | 0.02                                                                      | 4  |
| S2. At any time in (your child's/your) life, did a grown-up (your child/you) did <u>not</u> know touch (your child's/your) private parts when they shouldn't have, make (your child/you) touch their private parts or force (your child/you) to have sex?                                                    | 0.01                                                                      | 1  |
| S4. At any time in (your child's/your) life, did anyone TRY to force (your child/you) to have sex, that is sexual intercourse of any kind, even if it didn't happen?                                                                                                                                         | 0.01                                                                      | 2  |
| S6. At any time in (your child's/your) life, did anyone hurt (your child's/your) feelings by saying or writing something sexual about (your child/you) or (your child's/your) body?                                                                                                                          | 0.03                                                                      | 2  |
| <b>[CHILDREN 12 AND OLDER]</b>                                                                                                                                                                                                                                                                               |                                                                           |    |
| S7. At any time in your life, did you do sexual things with anyone 18 or older, even things you wanted?                                                                                                                                                                                                      | 0.02                                                                      | 2  |
